# Supplementary material for: Morpholine-modified Ru-based agents with multiple antibacterial mechanisms as metalloantibiotic candidates against Staphylococcus aureus infection
Source: Royal Society of Chemistry journal article supplement (doi:10.1039/d4ra02667e), 2024-01-01
Supplement: d4ra02667e1.pdf [file d4ra02667e1.pdf]

## Supporting Information

### **Morpholine modified Ru-based agents with multiple antibacterial mechanisms as metalloantibiotic candidates against *Staphylococcus aureus* infection**

Shijie Lin<sup>a§</sup>, Yun Song<sup>b§</sup>, Yajuan Sun<sup>b§</sup>, Wenjing Lin<sup>b</sup>, Guangying Yu<sup>b</sup>, Xiangwen Liao<sup>b</sup>,

Qiang Yang<sup>c\*</sup>

[a] Department of Pharmacy, Hainan General Hospital (Hainan Affiliated Hospital of Hainan Medical University), Haikou, 570311, China

[b] Jiangxi Provincial Key Laboratory of Drug Design and Evaluation, School of Pharmacy, Jiangxi Science & Technology Normal University, Nanchang, 330013, China

[c] Department of Clinical Pharmacy, Hainan Cancer Hospital, Haikou, 570100, China

§ These authors contribute equally to this work

\* Correspondence author:

Qiang Yang, E-mail: [18789551643@163.com](mailto:18789551643@163.com)

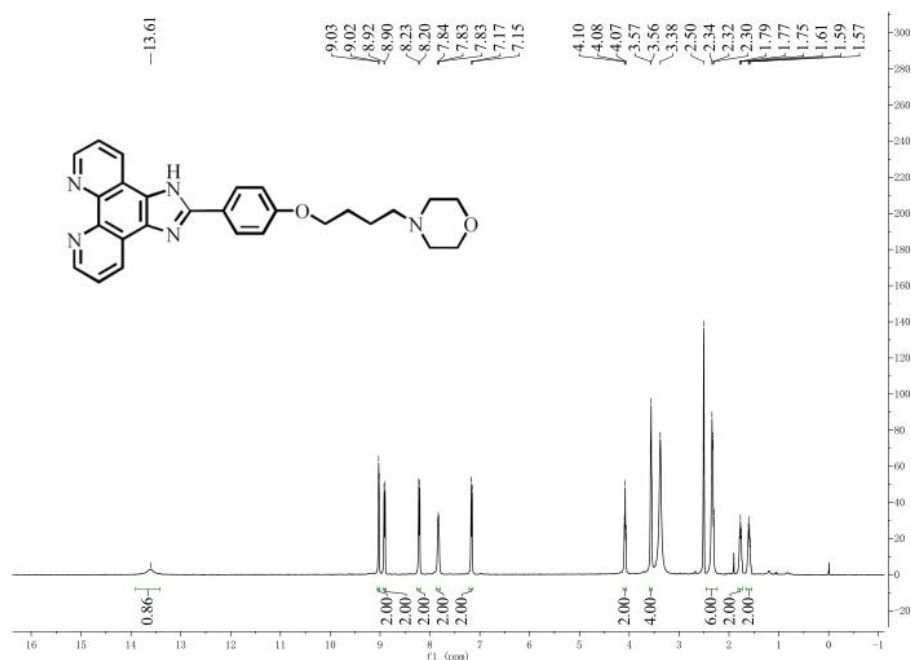

**Figure S1.** The  $^1\text{H}$  NMR of MPLP ligand

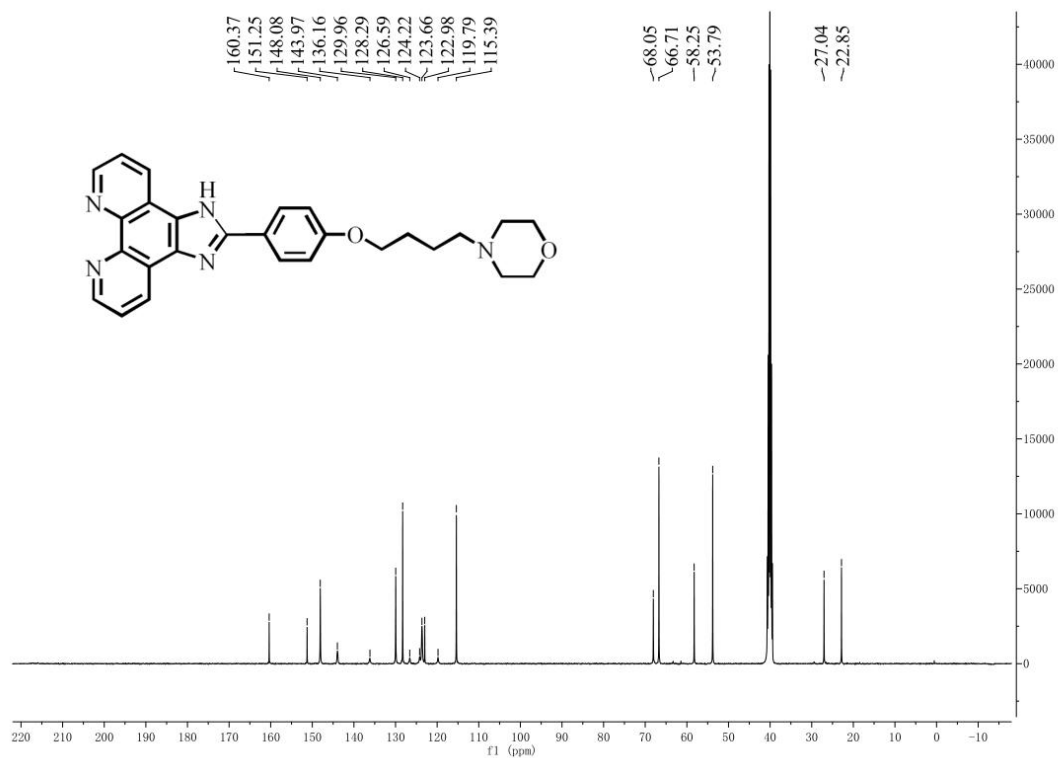

**Figure S2.** The  $^{13}\text{C}$  NMR spectrum of the MPLP.

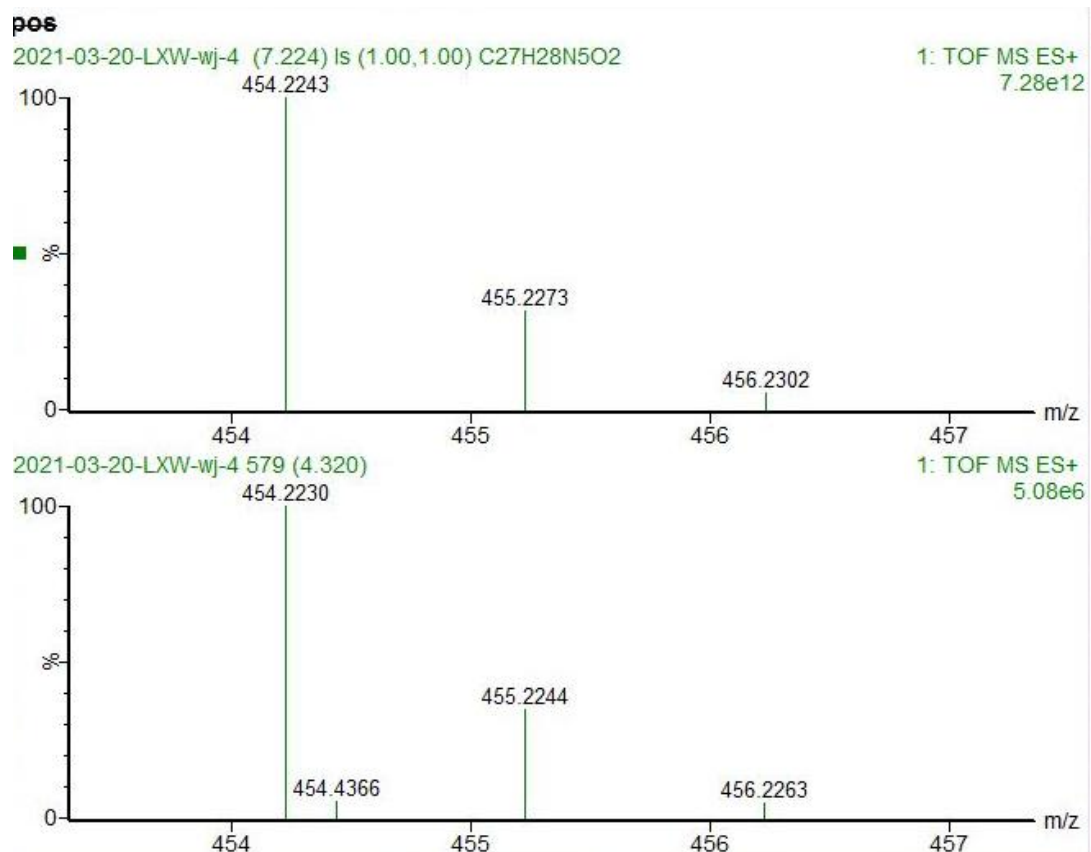

Figure S3. The HMRS of ligand MPLP.

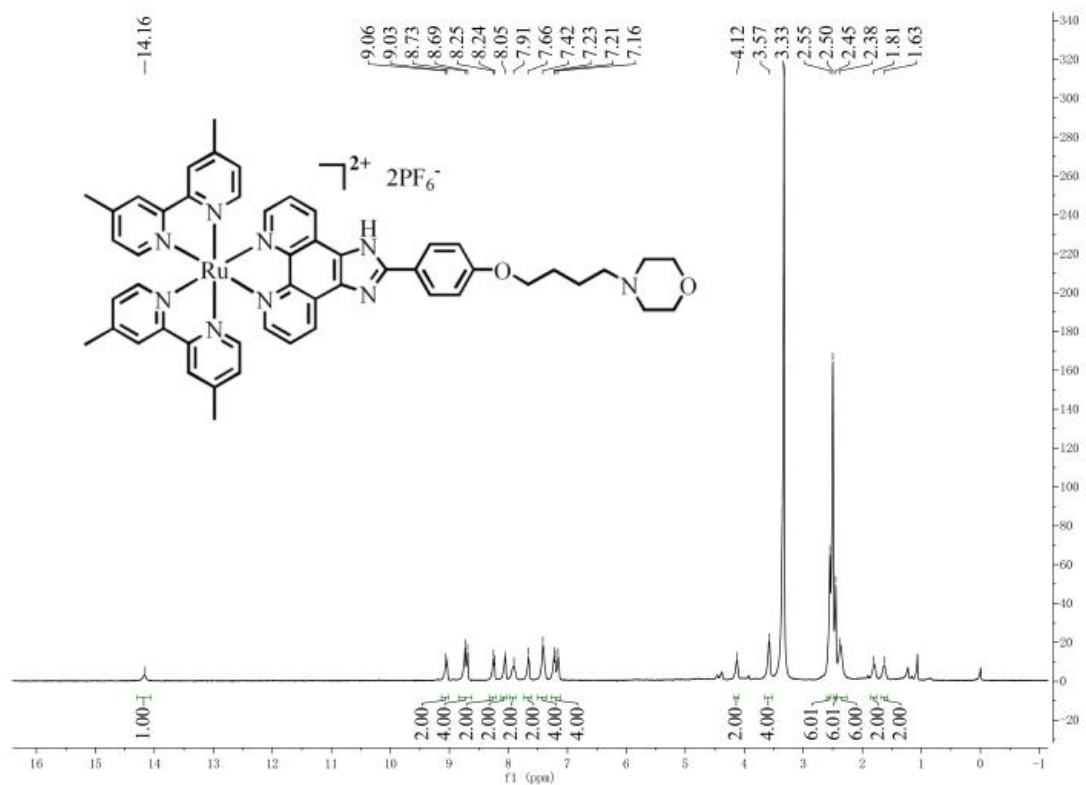

Figure S4. The <sup>1</sup>H NMR of Ru(II)-1.

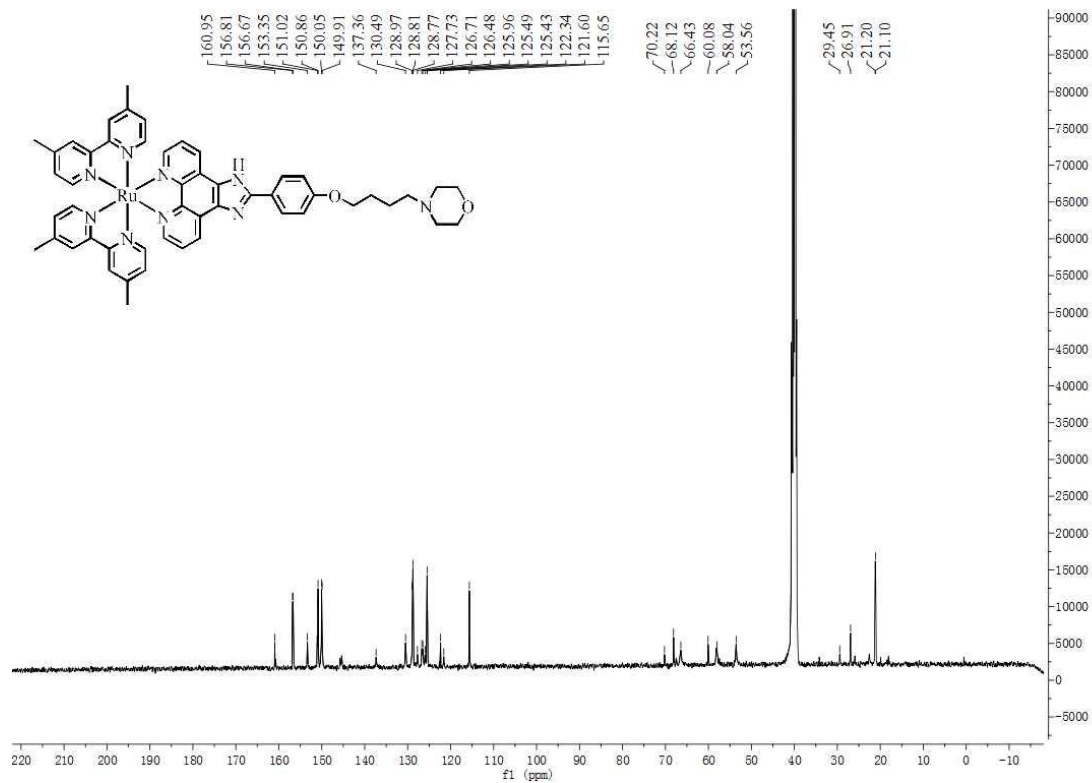

Figure S5. The  $^{13}\text{C}$  NMR spectrum of the Ru(II)-1.

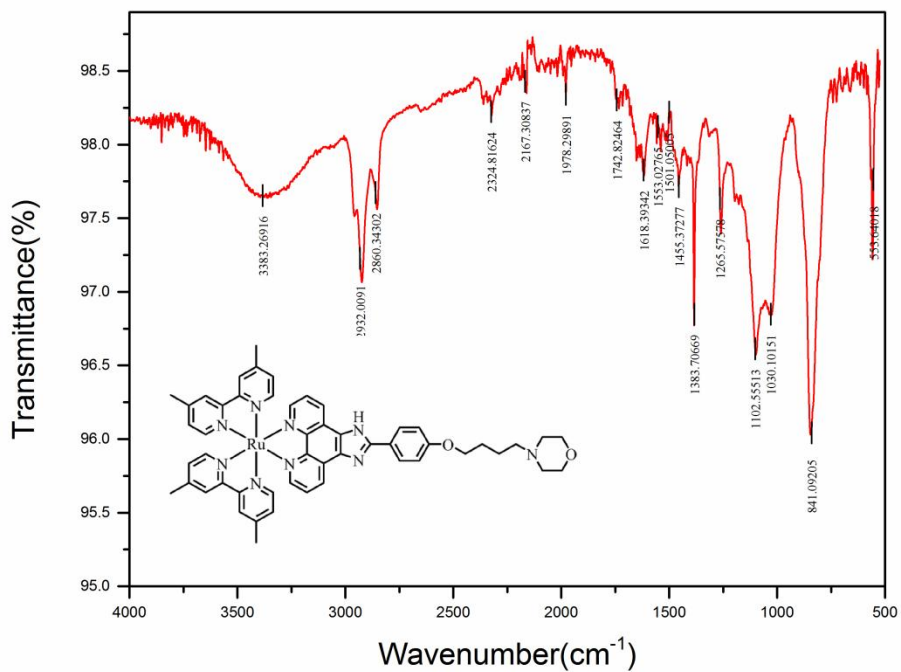

Figure S6. The IR spectrum of the Ru(II)-1.

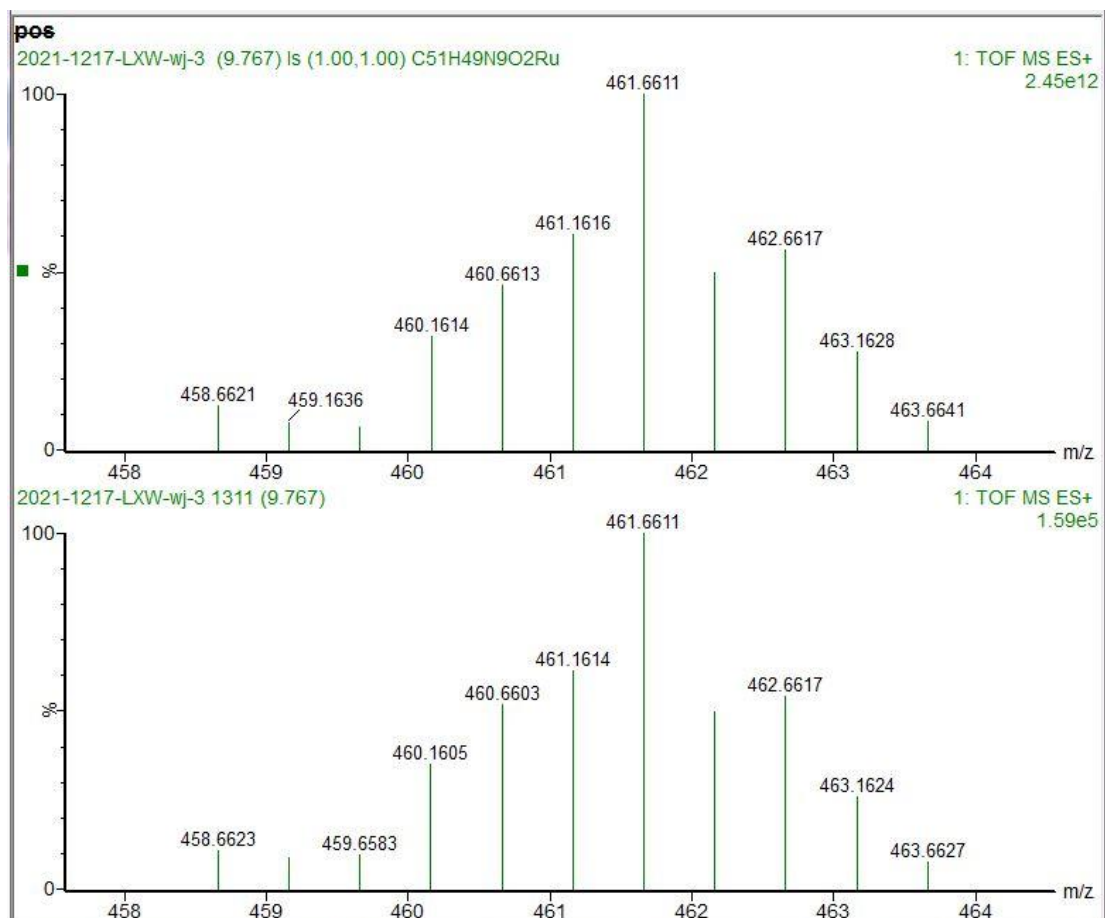

**Figure S7.** The HMRS of ligand **Ru(II)-1**.

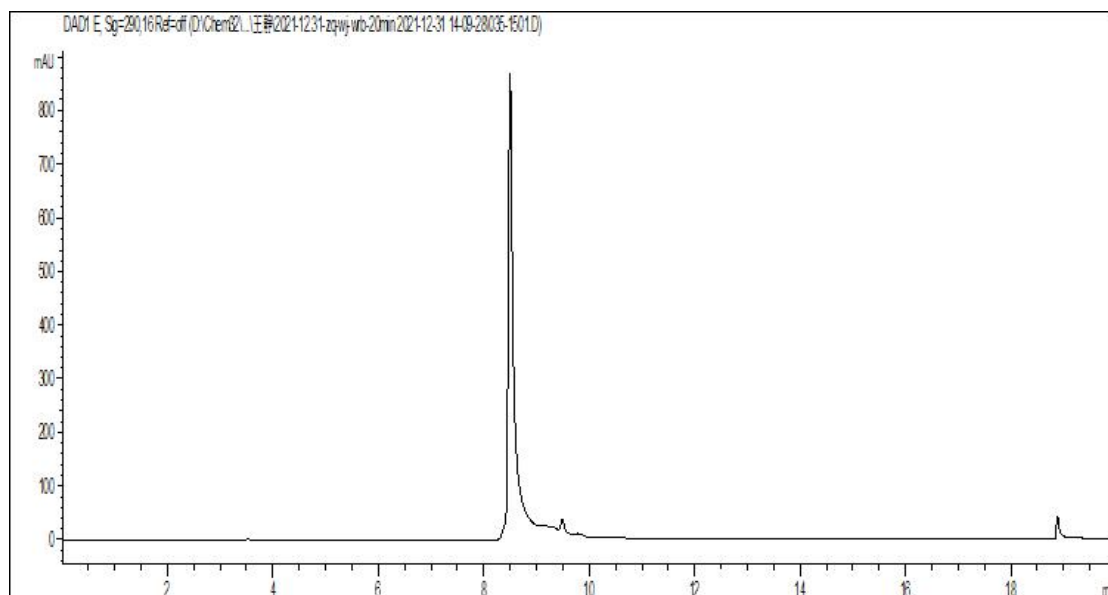

**Figure S8.** The HPLC of **Ru(II)-1**.

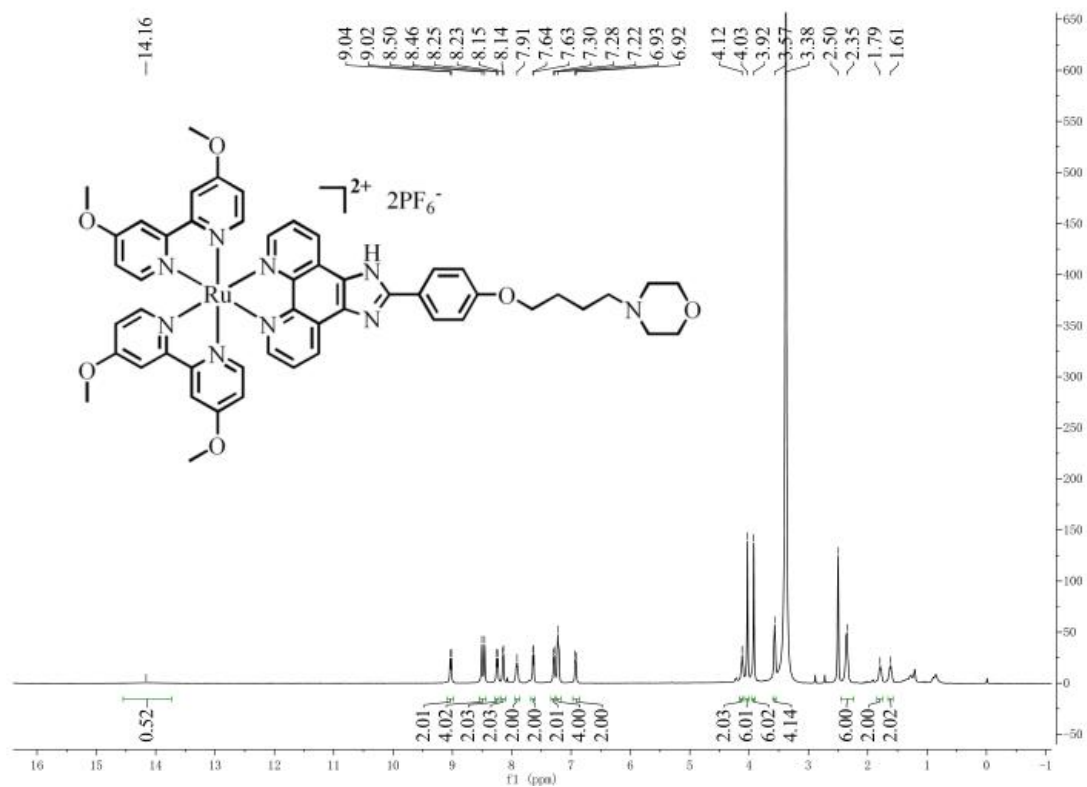

Figure S9. The <sup>1</sup>H NMR of Ru(II)-2.

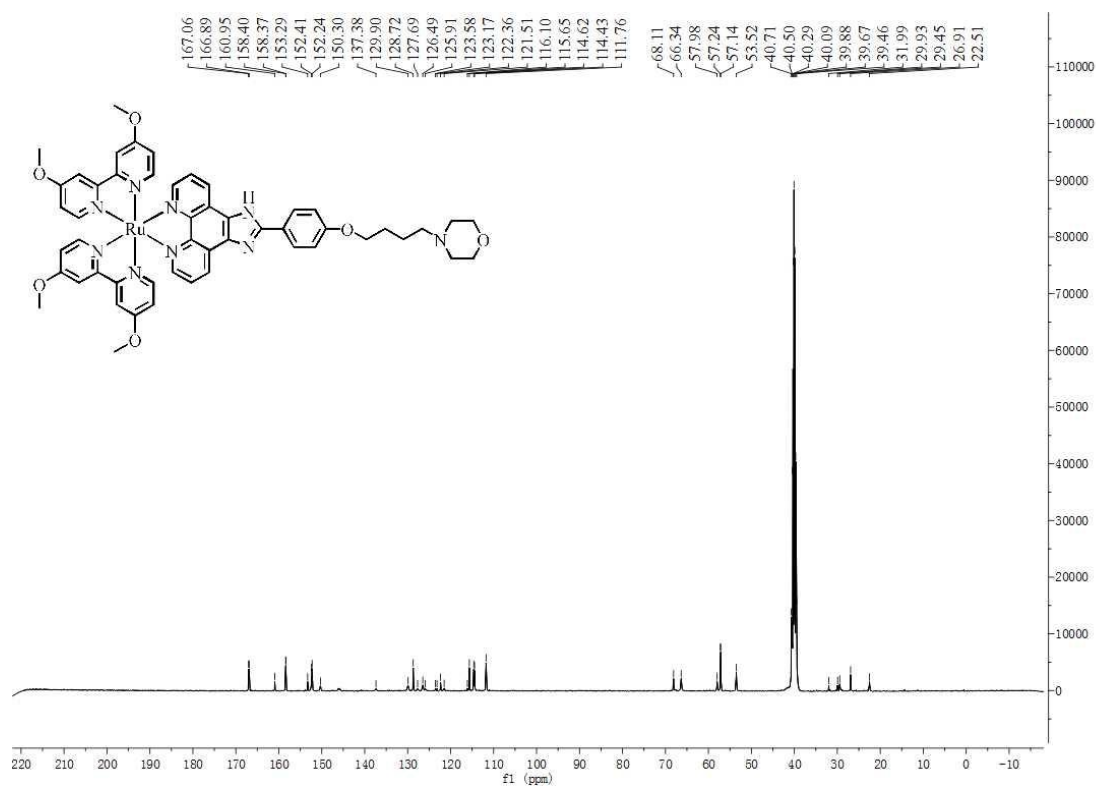

Figure S10. The <sup>13</sup>C NMR spectrum of the Ru(II)-2.

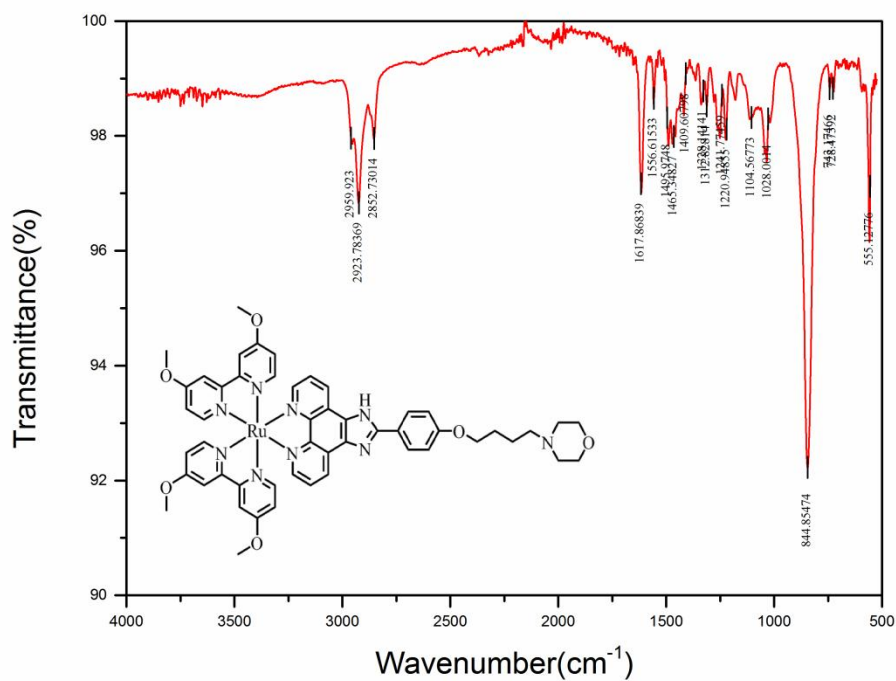

Figure S11. The IR spectrum of the Ru(II)-2.

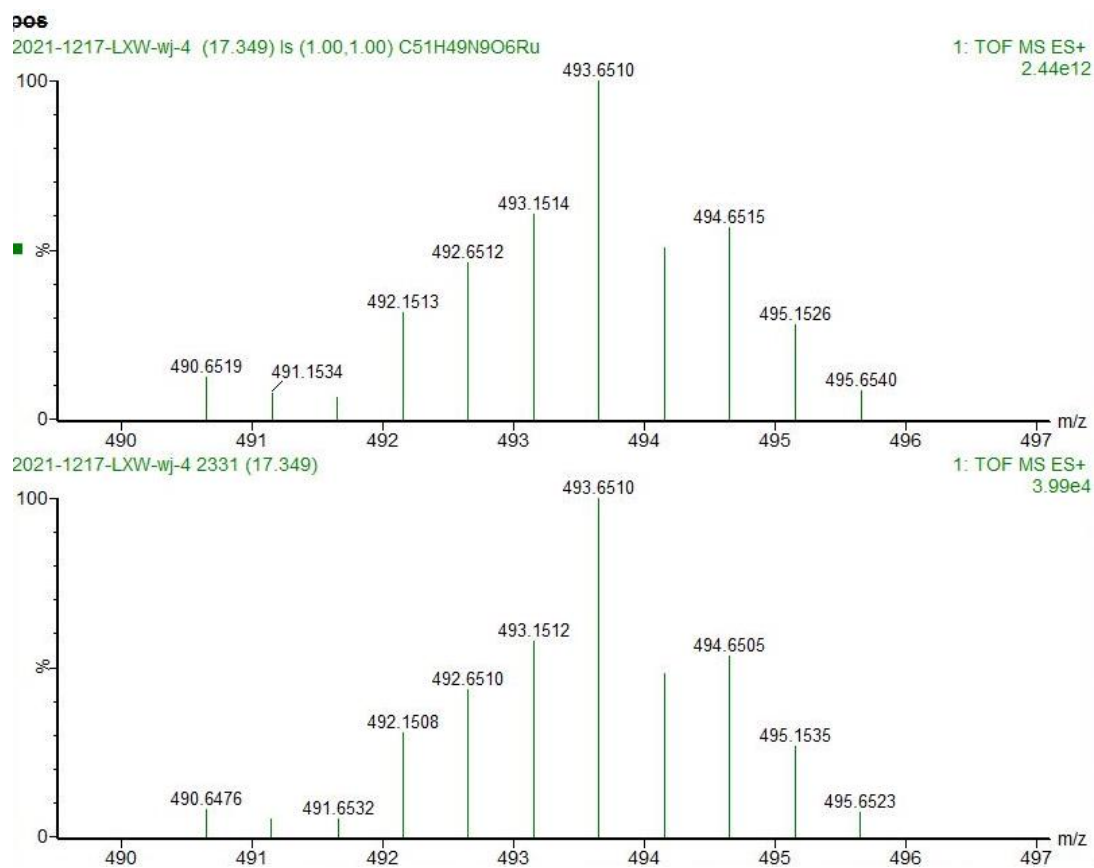

Figure S12. The HRMS of ligand Ru(II)-2.

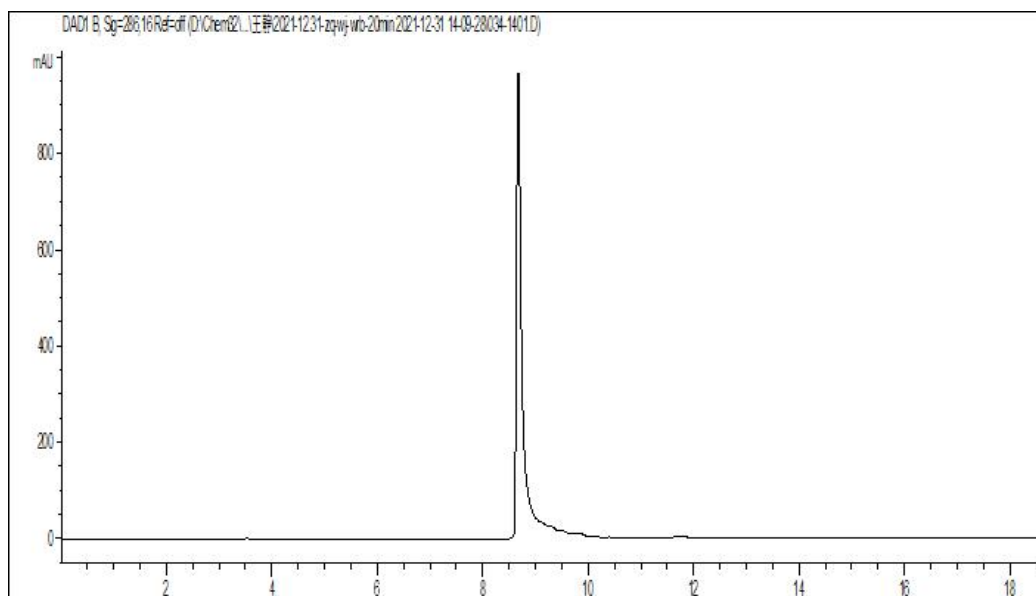

Figure S13. The HPLC of Ru(II)-2.

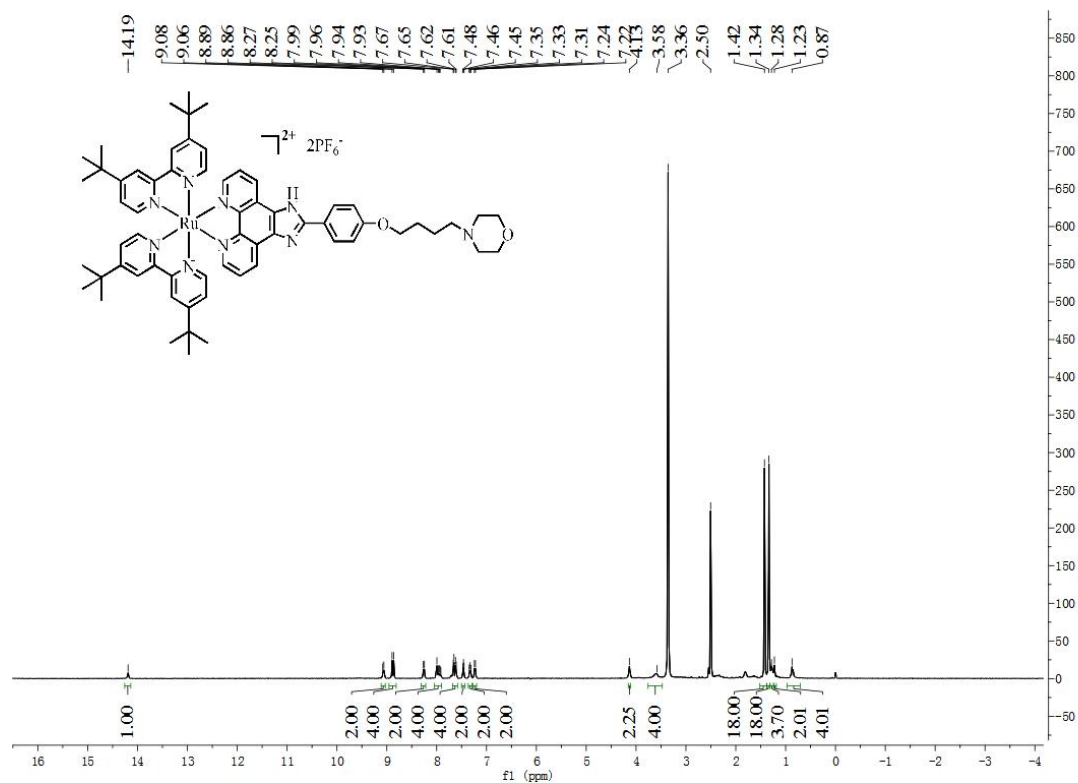

Figure S14. The <sup>1</sup>H NMR of Ru(II)-3.



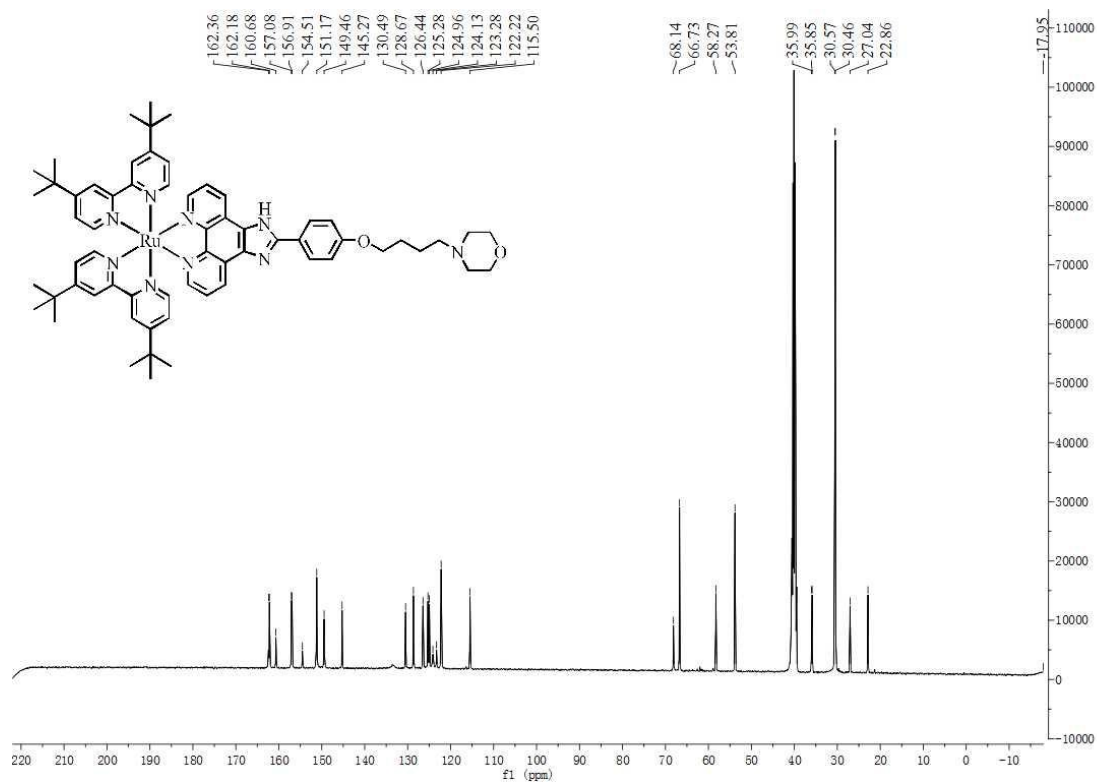

Figure S15. The  $^{13}\text{C}$  NMR spectrum of the Ru(II)-3.

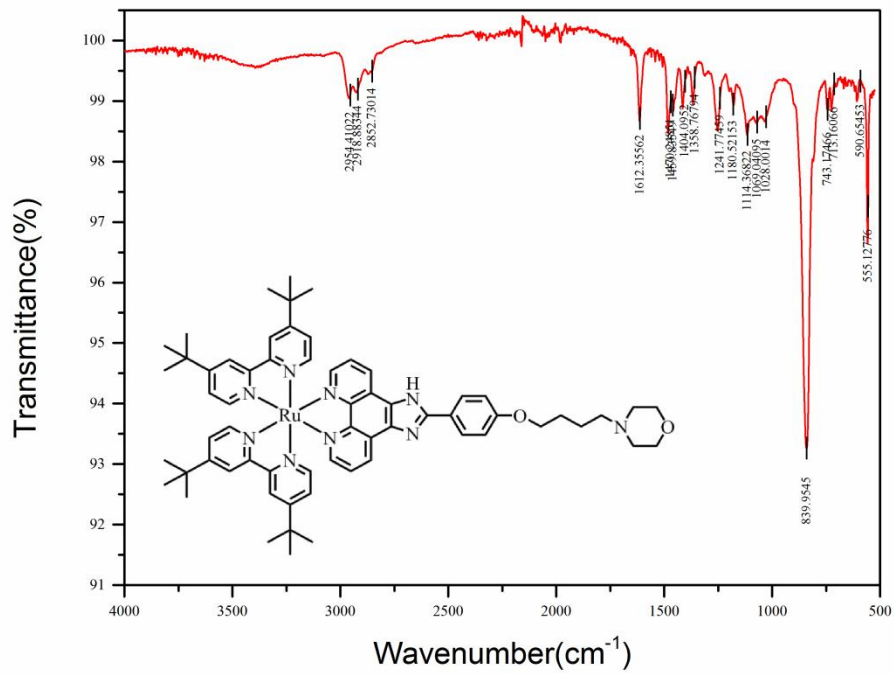

Figure S16. The IR spectrum of the Ru(II)-3

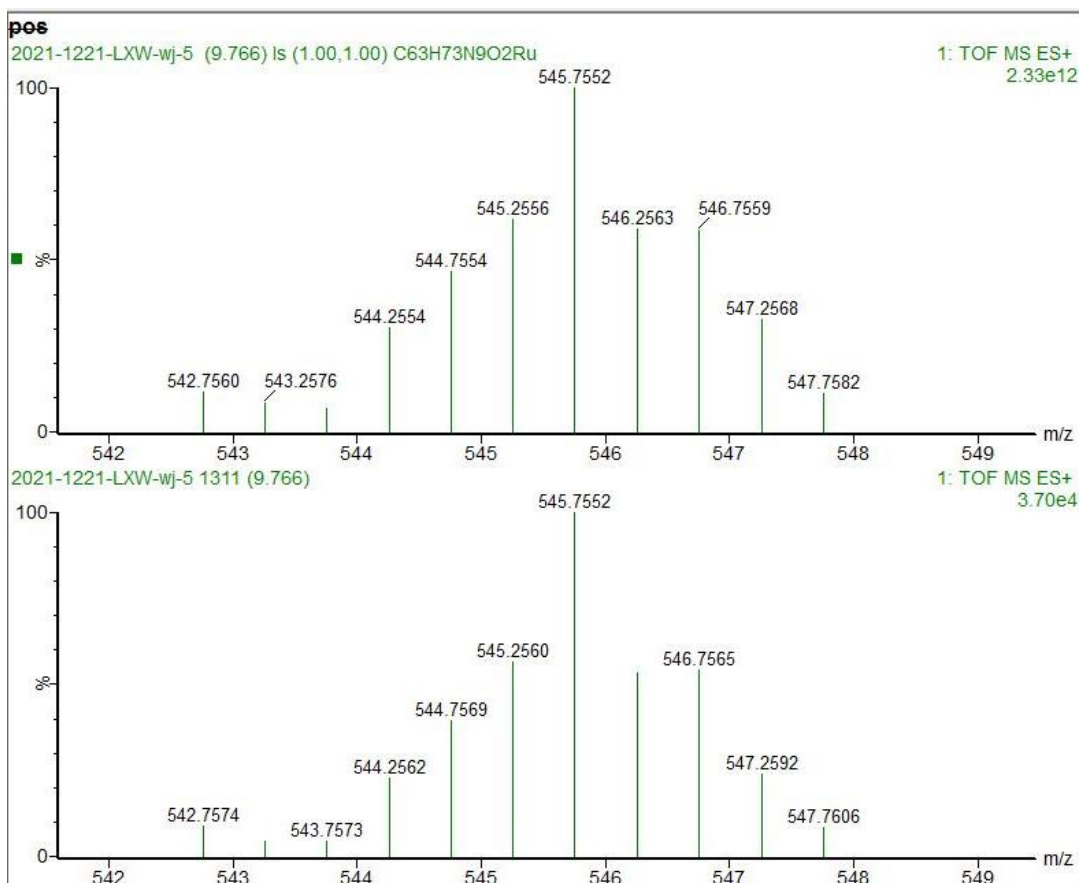

**Figure S17.** The HMRS of ligand **Ru(II)-3**.

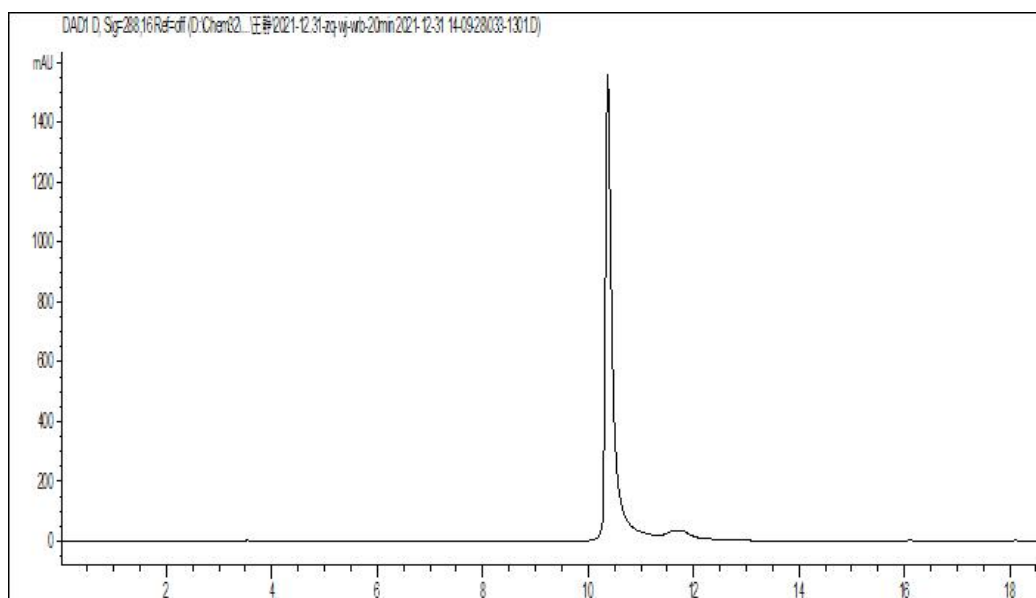

**Figure S18.** The HPLC of **Ru(II)-3**.

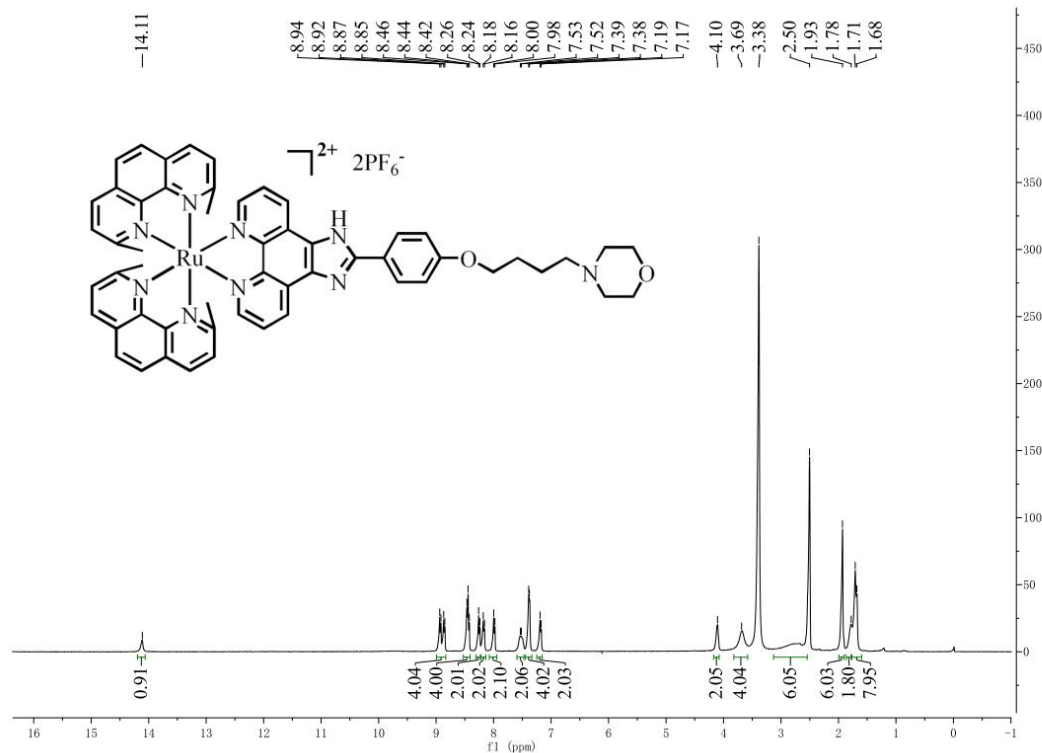

Figure S19. The  $^1H$  NMR of Ru(II)-4.

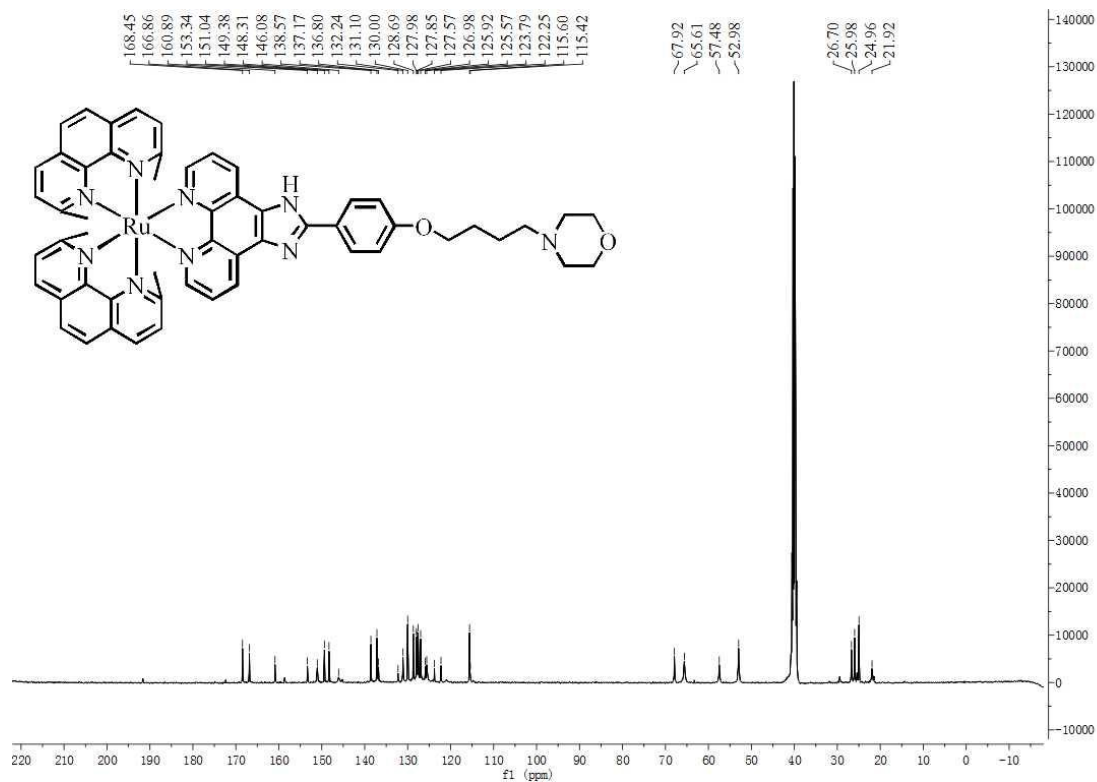

Figure S20. The  $^{13}C$  NMR spectrum of the Ru(II)-4.

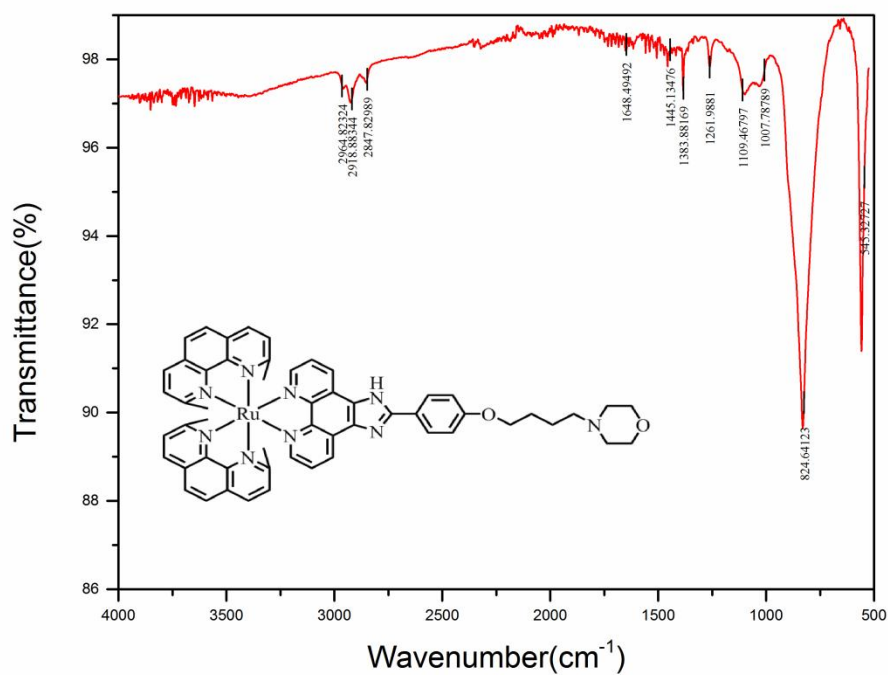

Figure S21. The IR spectrum of the Ru(II)-4

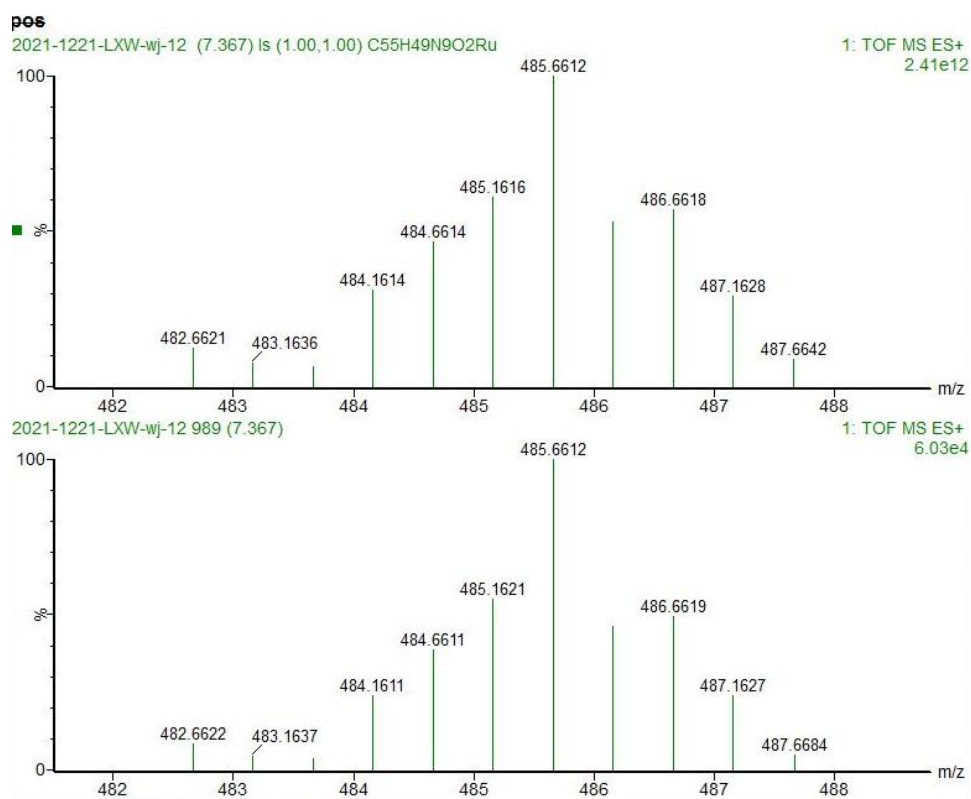

Figure S22. The HMRS of ligand Ru(II)-4.

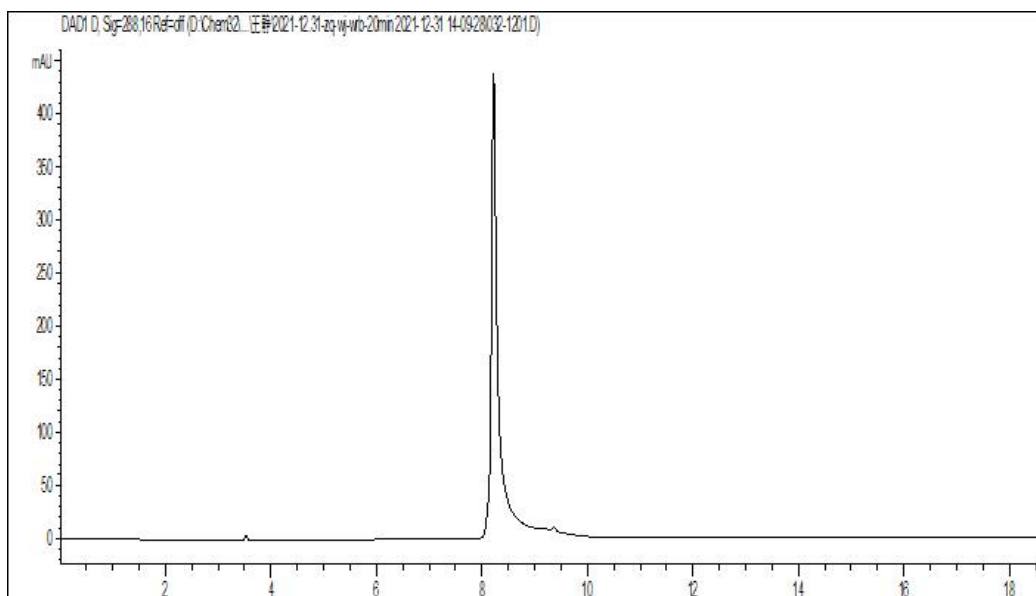

**Figure S23.** The HPLC of Ru(II)-4.

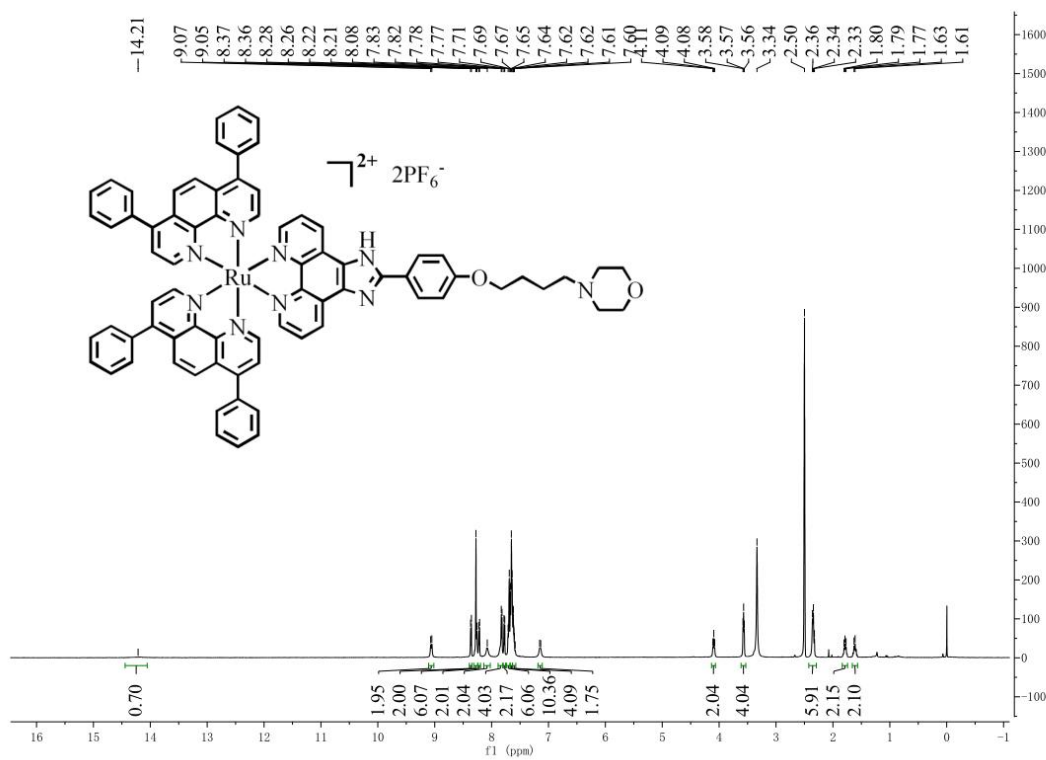

**Figure S24.** The  $^1\text{H}$  NMR of Ru(II)-5.

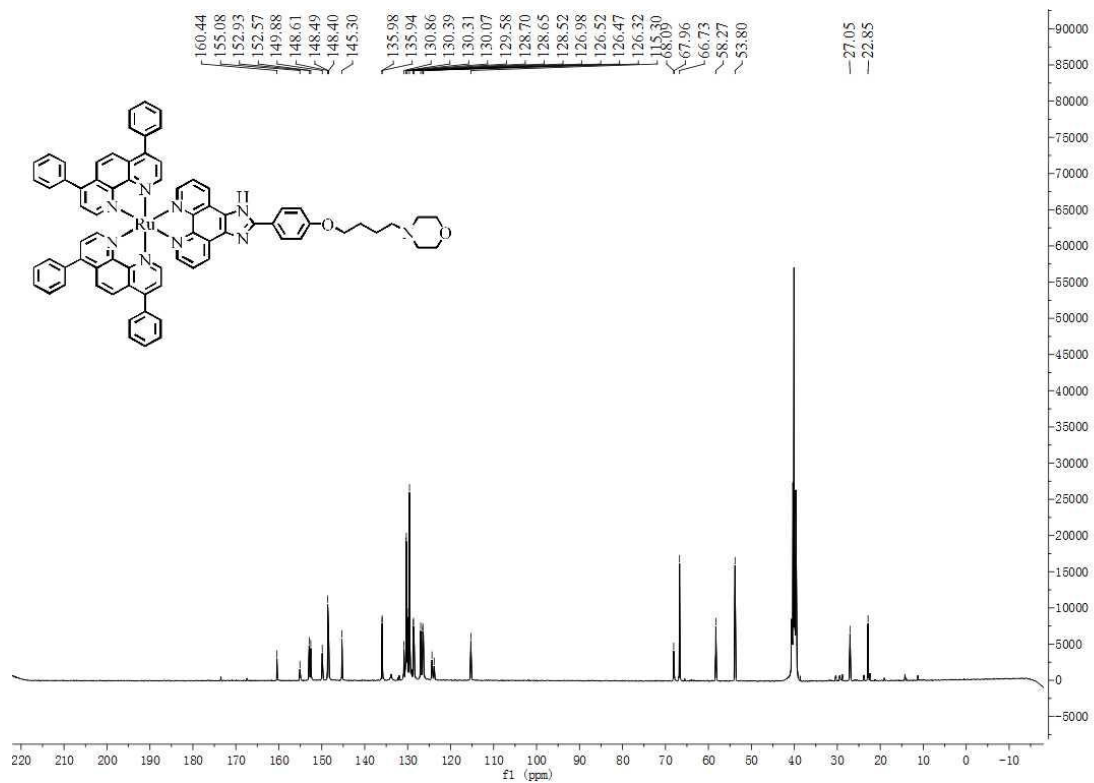

Figure S25. The  $^{13}\text{C}$  NMR spectrum of the Ru(II)-5.

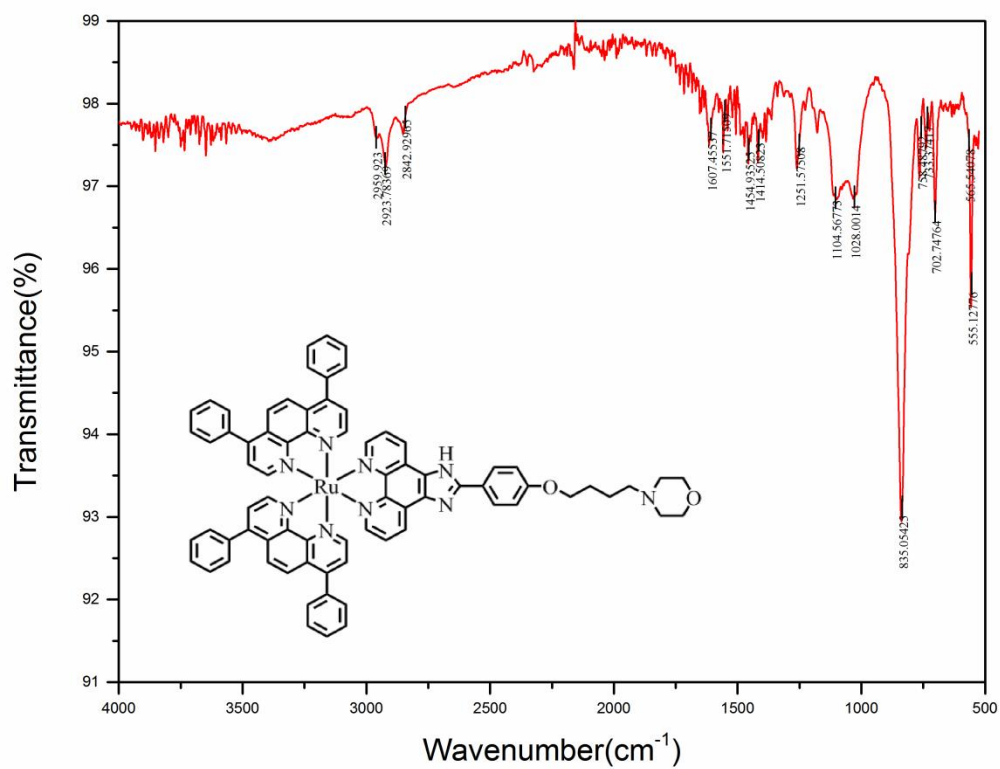

Figure S26. The IR spectrum of the Ru(II)-5

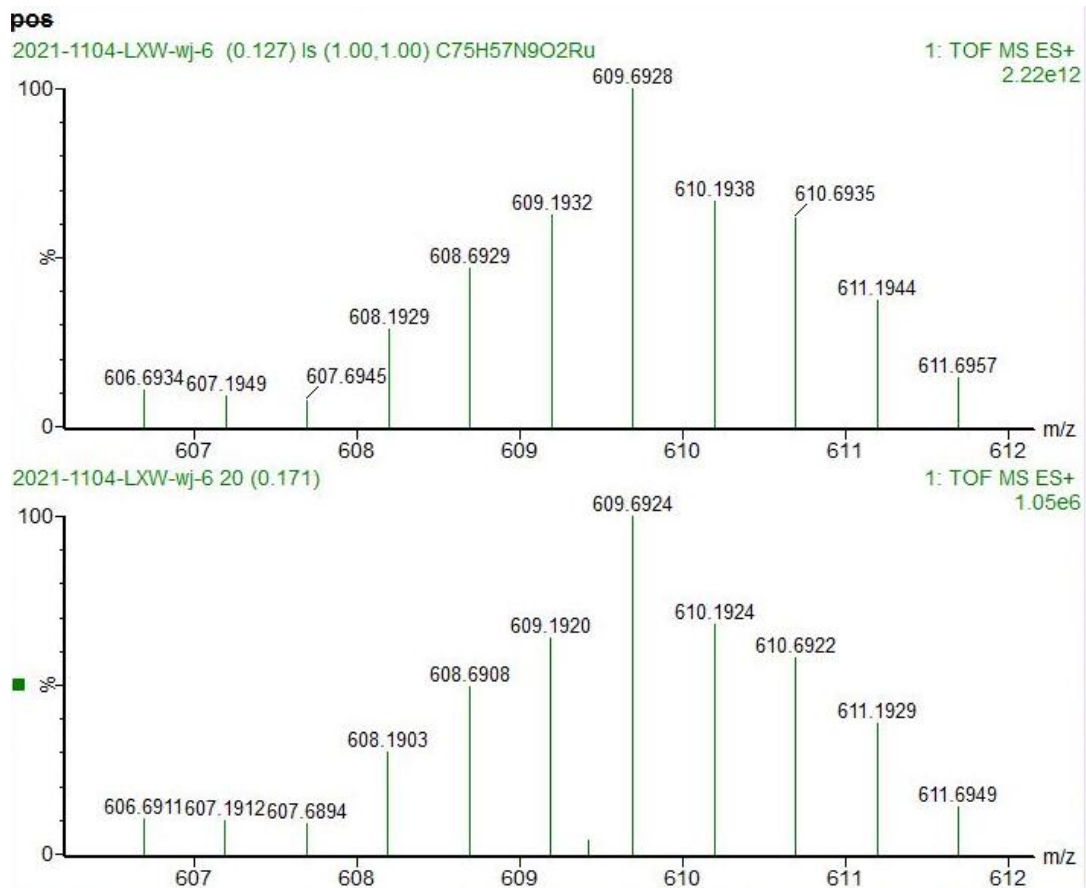

Figure S27. The HMRS of ligand Ru(II)-5.

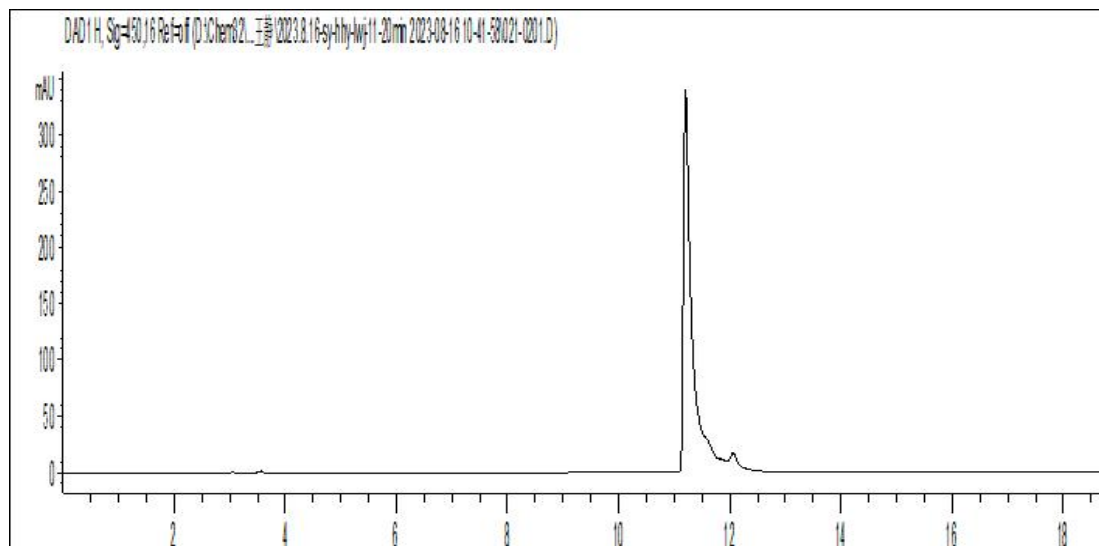

Figure S28. The HPLC of Ru(II)-5.

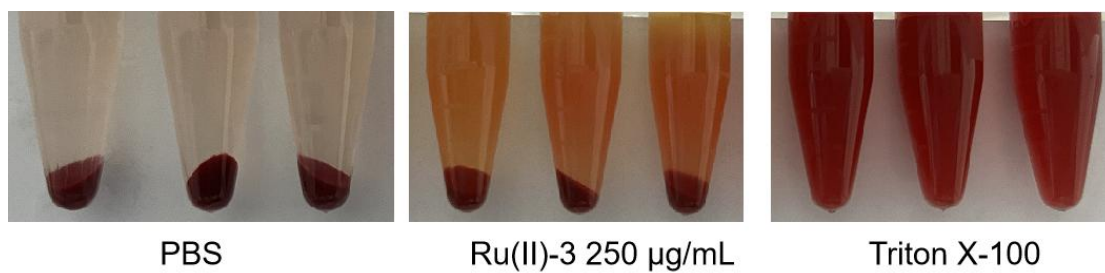

**Figure S29.** The images of the hemolytic effect of **Ru(II)-3** on rabbit blood cell.

**Table S1.** Minimum inhibitory concentration (MIC) values of **Ru(II)-3** against drug-resistant *S. aureus* (MRSA) isolated from the clinic.

| Compound        | MIC $\mu\text{g/mL}$ |
|-----------------|----------------------|
| <b>Ru(II)-3</b> | 0.2                  |
| Clindamycin     | Resistance           |
| Penicillin G    | Resistance           |
